# Supplementary material
Source: PubMed Central journal article supplement (PMC6358227)
Supplement: sky433_suppl_supplementary_material.pdf [file sky433_suppl_supplementary_material.pdf]

## E-SUPPLEMENTS

### Supplementary Appendix 1: Expected metafounder self-relationship with uniformly distributed base generation allele frequencies

The self-relationship of a metafounder can be computed as (Christensen, 2012; Garcia-Baccino et al., 2017):  $\gamma = 8\sigma_p^2$  where  $\sigma_p^2$  is the variance of the allele frequencies ( $p$ ) in the base population. We can write the expectation of this variance as:

$$E(\sigma_p^2) = E(p - \bar{p})^2 = \int_0^1 (p - \bar{p})^2 \varphi(p) dp$$

If the allele frequencies in the base follow a standard uniform distribution, i.e.  $U(0,1)$ , the probability density function is equal to  $\varphi(p) = \frac{1}{1-0} = 1$ . Thus, in this case:

$$E(\sigma_p^2) = \int_0^1 (p - \bar{p})^2 dp$$

Considering that  $\bar{p} = \frac{1}{2}$ , the primitive of  $(p - \bar{p})^2$  is  $F\left(\left(p - \frac{1}{2}\right)^2\right) = F\left(p^2 - p + \frac{1}{4}\right) = \frac{1}{3}p^3 - \frac{1}{2}p^2 + \frac{1}{4}p$ , so

$$E(\sigma_p^2) = \int_0^1 (p - \bar{p})^2 dp = F(1) - F(0) = \frac{1}{12}$$

Thus, if the allele frequencies in the base are uniformly distributed, the expectation of the self-relationship of a metafounder is:  $E(\gamma) = 8E(\sigma_p^2) = \frac{2}{3}$ . The above can also be derived using a Beta(1,1) distribution, noting that this is equivalent to a  $U(0,1)$  distribution.

If the distribution of the allele frequencies in the base is U-shaped, there is an increased frequency of alleles with low minor allele frequency, such that  $E(\sigma_p^2) > \frac{1}{12}$ , and  $E(\gamma) > \frac{2}{3}$ . If the distribution of the allele frequencies in the base is concave, there is a decreased frequency of alleles with low minor allele frequency, such that  $E(\sigma_p^2) < \frac{1}{12}$ , and  $E(\gamma) < \frac{2}{3}$ .

**Supplementary Table 1.** Standard errors for the estimated variance components for the related scenario for three different models: PBLUP, ssGBLUP and ssGBLUP using metafounders. Residual and genetic variances estimates are presented for purebred traits 1, 2, and 3 and crossbred traits 23 and 1(23).

| Model      | Trait | Residual | Genetic variances and correlations <sup>1</sup> |       |       |       |       |
|------------|-------|----------|-------------------------------------------------|-------|-------|-------|-------|
|            |       |          | 1                                               | 2     | 3     | 23    | 1(23) |
| PBLUP      | 1     | 0.034    | 0.035                                           | 0.130 | 0.103 | 0.093 | 0.079 |
|            | 2     | 0.023    | 0.130                                           | 0.040 | 0.088 | 0.058 | 0.067 |
|            | 3     | 0.040    | 0.103                                           | 0.088 | 0.055 | 0.037 | 0.085 |
|            | 23    | 0.056    | 0.093                                           | 0.058 | 0.037 | 0.062 | 0.023 |
|            | 1(23) | 0.043    | 0.079                                           | 0.067 | 0.085 | 0.023 | 0.060 |
| ssGBLUP    | 1     | 0.032    | 0.033                                           | 0.084 | 0.108 | 0.081 | 0.062 |
|            | 2     | 0.022    | 0.084                                           | 0.040 | 0.068 | 0.059 | 0.053 |
|            | 3     | 0.042    | 0.108                                           | 0.068 | 0.061 | 0.044 | 0.101 |
|            | 23    | 0.053    | 0.081                                           | 0.059 | 0.044 | 0.059 | 0.030 |
|            | 1(23) | 0.037    | 0.062                                           | 0.053 | 0.101 | 0.030 | 0.060 |
| ssGBLUP-MF | 1     | 0.029    | 0.031                                           | 0.054 | 0.101 | 0.064 | 0.102 |
|            | 2     | 0.022    | 0.054                                           | 0.038 | 0.078 | 0.056 | 0.054 |
|            | 3     | 0.042    | 0.101                                           | 0.078 | 0.053 | 0.049 | 0.101 |
|            | 23    | 0.050    | 0.064                                           | 0.056 | 0.049 | 0.055 | 0.025 |
|            | 1(23) | 0.043    | 0.102                                           | 0.054 | 0.101 | 0.025 | 0.054 |

<sup>1</sup>Standard errors for the genetic variances are on the diagonal; standard errors for the genetic correlations are on the off-diagonal.

**Supplementary Table 2.** Standard errors for the estimated variance components for the unrelated scenario for three different models: PBLUP, ssGBLUP and ssGBLUP using metafounders. Residual and genetic variances estimates are presented for purebred traits 1, 2, and 3 and crossbred traits 23 and 1(23).

| Model      | Trait | Residual | Genetic variances and correlations <sup>1</sup> |       |       |       |       |
|------------|-------|----------|-------------------------------------------------|-------|-------|-------|-------|
|            |       |          | 1                                               | 2     | 3     | 23    | 1(23) |
| PBLUP      | 1     | 0.039    | 0.055                                           | 0.080 | 0.108 | 0.084 | 0.083 |
|            | 2     | 0.026    | 0.080                                           | 0.037 | 0.101 | 0.046 | 0.061 |
|            | 3     | 0.039    | 0.108                                           | 0.101 | 0.040 | 0.057 | 0.072 |
|            | 23    | 0.038    | 0.084                                           | 0.046 | 0.057 | 0.064 | 0.050 |
|            | 1(23) | 0.097    | 0.083                                           | 0.061 | 0.072 | 0.050 | 0.068 |
| ssGBLUP    | 1     | 0.041    | 0.064                                           | 0.078 | 0.101 | 0.068 | 0.075 |
|            | 2     | 0.025    | 0.078                                           | 0.041 | 0.103 | 0.052 | 0.073 |
|            | 3     | 0.044    | 0.101                                           | 0.103 | 0.048 | 0.047 | 0.067 |
|            | 23    | 0.030    | 0.068                                           | 0.052 | 0.047 | 0.074 | 0.046 |
|            | 1(23) | 0.090    | 0.075                                           | 0.073 | 0.067 | 0.046 | 0.057 |
| ssGBLUP-MF | 1     | 0.031    | 0.045                                           | 0.054 | 0.101 | 0.064 | 0.102 |
|            | 2     | 0.023    | 0.054                                           | 0.035 | 0.078 | 0.056 | 0.054 |
|            | 3     | 0.046    | 0.101                                           | 0.078 | 0.045 | 0.049 | 0.101 |
|            | 23    | 0.024    | 0.064                                           | 0.056 | 0.049 | 0.056 | 0.025 |
|            | 1(23) | 0.077    | 0.102                                           | 0.054 | 0.101 | 0.025 | 0.036 |

<sup>1</sup>Standard errors for the genetic variances are on the diagonal; standard errors for the genetic correlations are on the off-diagonal.

**Supplementary Table 3.** Unscaled genetic variances estimated with ssGBLUP using metafounders for purebred traits 1, 2, and 3 and crossbred traits 23 and 1(23), for the related and unrelated scenario.

| Trait | Related | Unrelated |
|-------|---------|-----------|
| 1     | 1.214   | 1.722     |
| 2     | 1.171   | 1.630     |
| 3     | 1.308   | 1.750     |
| 23    | 1.267   | 1.313     |
| 1(23) | 1.268   | 1.329     |

**Supplementary Table 4.** Accuracies (averages across 10 replicates; SE within brackets) for purebred performance in lines 1, 2 and 3 (PB1, PB2, PB3) and crossbred performance in lines 1, 2 and 3 (CB1, CB2, CB3), for the related and unrelated scenarios.

| Trait | Related       |               |               | Unrelated     |               |               |
|-------|---------------|---------------|---------------|---------------|---------------|---------------|
|       | PBLUP         | ssGBLUP       | ssGBLUP_MF    | PBLUP         | ssGBLUP       | ssGBLUP_MF    |
| PB1   | 0.415 (0.018) | 0.514 (0.013) | 0.510 (0.013) | 0.433 (0.017) | 0.575 (0.015) | 0.575 (0.014) |
| PB2   | 0.467 (0.022) | 0.586 (0.016) | 0.585 (0.016) | 0.452 (0.021) | 0.588 (0.019) | 0.587 (0.018) |
| PB3   | 0.371 (0.025) | 0.471 (0.015) | 0.471 (0.015) | 0.398 (0.022) | 0.542 (0.015) | 0.540 (0.014) |
| CB1   | 0.265 (0.033) | 0.364 (0.027) | 0.338 (0.037) | 0.264 (0.046) | 0.395 (0.026) | 0.398 (0.022) |
| CB2   | 0.139 (0.030) | 0.290 (0.026) | 0.295 (0.026) | 0.134 (0.025) | 0.277 (0.021) | 0.267 (0.026) |
| CB3   | 0.224 (0.019) | 0.339 (0.022) | 0.336 (0.024) | 0.193 (0.037) | 0.310 (0.034) | 0.297 (0.037) |

**Supplementary Table 5.** Bias of the level of the (G)EBV (average for the 10 replicates; SE within brackets), measured as the intercept of the regression of TBV on (G)EBV, for purebred performance in lines 1, 2 and 3 (PB1, PB2, PB3) and crossbred performance in lines 1, 2 and 3 (CB1, CB2, CB3) for the related and unrelated scenarios.

| Trait | Related        |                |                | Unrelated      |                |                |
|-------|----------------|----------------|----------------|----------------|----------------|----------------|
|       | PBLUP          | ssGBLUP        | ssGBLUP_MF     | PBLUP          | ssGBLUP        | ssGBLUP_MF     |
| PB1   | 0.106 (0.116)  | 0.124 (0.127)  | 0.115 (0.120)  | -0.591 (0.473) | -0.723 (0.464) | -0.433 (0.466) |
| PB2   | -0.045 (0.108) | -0.004 (0.123) | 0.016 (0.124)  | -0.134 (0.385) | -0.083 (0.366) | -0.133 (0.383) |
| PB3   | 0.164 (0.112)  | 0.112 (0.120)  | 0.137 (0.107)  | -0.286 (0.269) | -0.290 (0.289) | -0.166 (0.249) |
| CB1   | 0.096 (0.188)  | 0.138 (0.184)  | 0.124 (0.179)  | 0.019 (0.329)  | -0.061 (0.339) | 0.138 (0.335)  |
| CB2   | -0.098 (0.187) | -0.076 (0.174) | -0.089 (0.185) | -0.011 (0.250) | 0.087 (0.232)  | 0.098 (0.238)  |
| CB3   | 0.158 (0.150)  | 0.160 (0.154)  | 0.176 (0.148)  | -0.006 (0.483) | 0.021 (0.418)  | 0.120 (0.408)  |

**Supplementary Table 6.** Bias of the scale of the (G)EBV (average for the 10 replicates; SE within brackets), measured as the slope of the regression of TBV on (G)EBV, for purebred performance in lines 1, 2 and 3 (PB1, PB2, PB3) and crossbred performance in lines 1, 2 and 3 (CB1, CB2, CB3) for the related and unrelated scenarios.

| Trait | Related       |               |               | Unrelated     |               |               |
|-------|---------------|---------------|---------------|---------------|---------------|---------------|
|       | PBLUP         | ssGBLUP       | ssGBLUP_MF    | PBLUP         | ssGBLUP       | ssGBLUP_MF    |
| PB1   | 0.961 (0.042) | 0.959 (0.030) | 0.944 (0.029) | 1.050 (0.051) | 1.087 (0.044) | 0.998 (0.033) |
| PB2   | 1.054 (0.058) | 1.050 (0.041) | 1.023 (0.038) | 1.022 (0.042) | 1.078 (0.024) | 0.988 (0.024) |
| PB3   | 0.924 (0.050) | 0.942 (0.036) | 0.915 (0.034) | 0.960 (0.057) | 1.052 (0.048) | 0.954 (0.041) |
| CB1   | 0.859 (0.091) | 0.883 (0.042) | 0.797 (0.073) | 1.097 (0.229) | 1.048 (0.078) | 1.019 (0.086) |
| CB2   | 0.679 (0.137) | 0.934 (0.094) | 0.885 (0.099) | 0.689 (0.149) | 0.895 (0.095) | 0.705 (0.081) |
| CB3   | 0.845 (0.088) | 0.886 (0.075) | 0.864 (0.062) | 0.865 (0.162) | 0.954 (0.085) | 0.819 (0.096) |
